# Supplementary material for: Hyperactivation of Nrf2 in early tubular development induces nephrogenic diabetes insipidus
Source: PubMed Central journal article supplement (PMC5333130; doi:10.1038/ncomms14577), 2017-02-24
Supplement: ncomms14577-s1.pdf [file ncomms14577-s1.pdf]

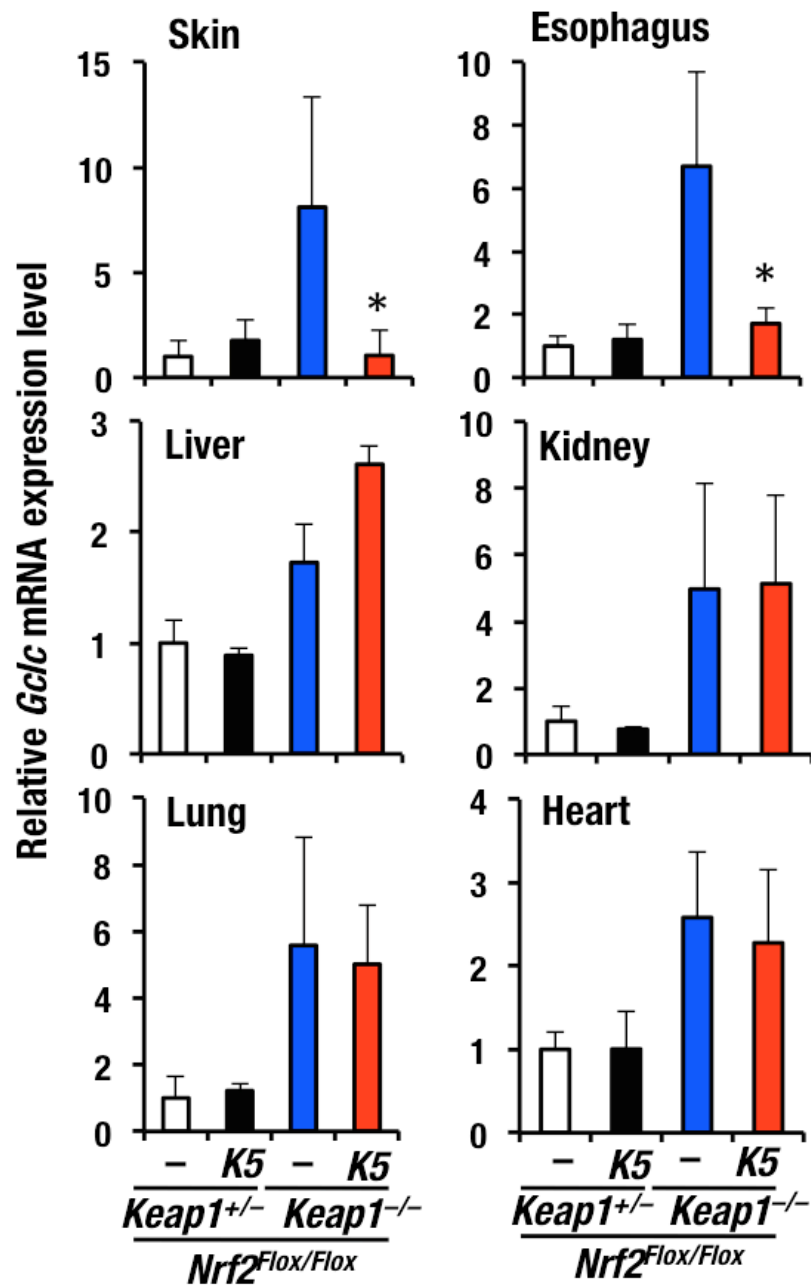

**Supplementary Figure 1.** Relative *Gclc* gene expression level normalized to *Hprt* expression in the esophagus, skin, liver, lung, kidney and heart of mice at 10 days of age. Data are the means  $\pm$  SE (n=4). (\*,  $p < 0.05$  compared to *Keap1*<sup>-/-</sup>::*Nrf2*<sup>Flox/Flox</sup>, unpaired *t*-test).

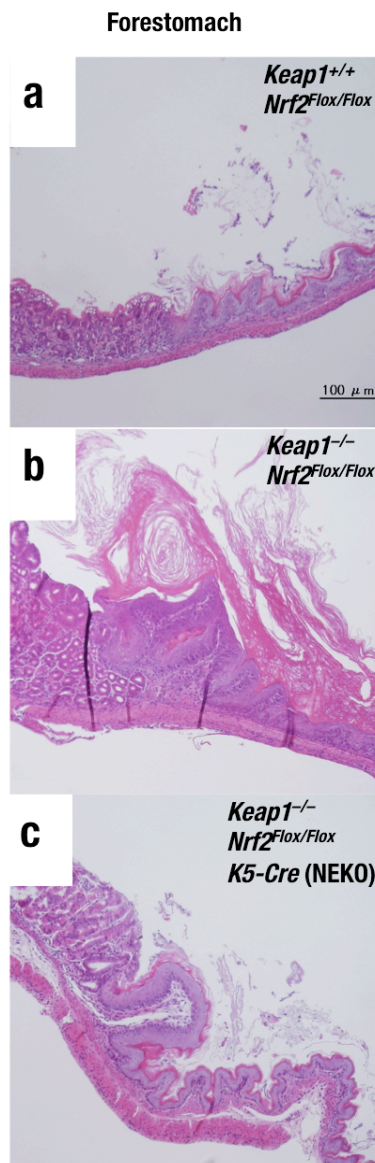

**Supplementary Figure 2.** (a-c) Representative images of HE staining of transverse sections of the forestomach from mice at 10 days of age. (a) *Keap1<sup>+/+</sup>::Nrf2<sup>Flox/Flox</sup>* mouse forestomach, (b) *Keap1<sup>-/-</sup>::Nrf2<sup>Flox/Flox</sup>* mouse forestomach, and (c) *Keap1<sup>-/-</sup>::Nrf2<sup>Flox/Flox</sup>::K5-Cre* mouse forestomach (n=3). Note that Nrf2 ablation rescued the hyper-keratinization phenotype of *Keap1<sup>-/-</sup>::Nrf2<sup>Flox/Flox</sup>* mouse forestomach. Scale bar, 100  $\mu$ m.

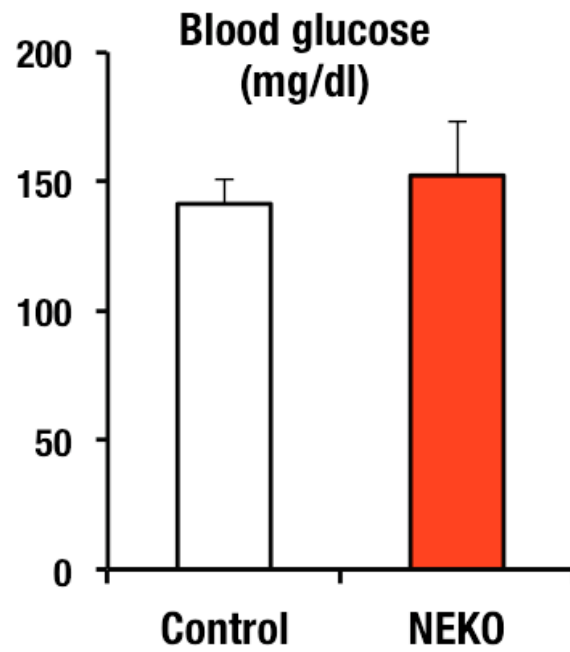

**Supplementary Figure 3.** Blood glucose levels of control and NEKO mice. Male mice of 8-12 weeks of age were utilized. Data are the means  $\pm$  SE (n=5). Control genotype is described in Materials and Methods.

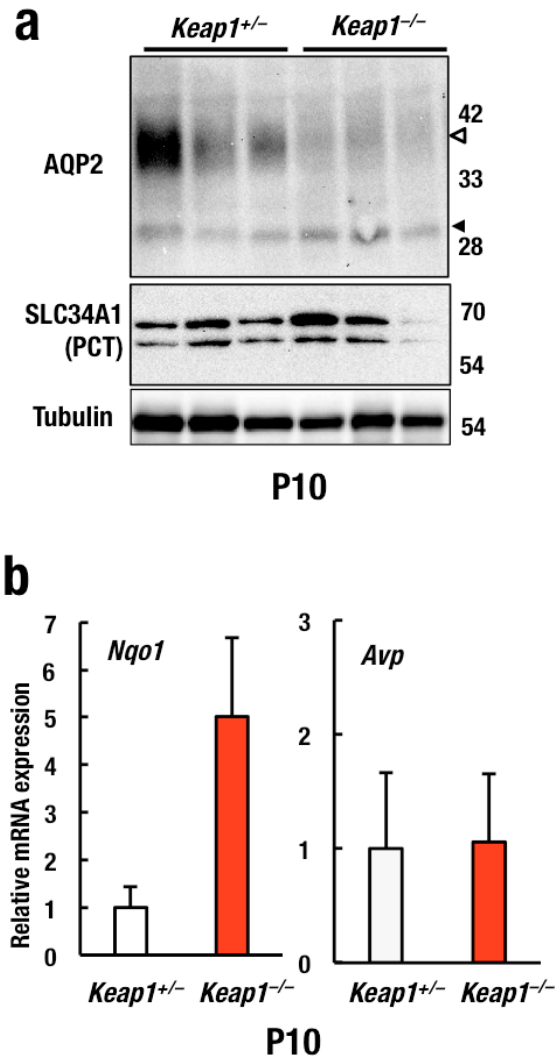

**Supplementary Figure 4. (a)** Immunoblot analysis of AQP2 and SLC34A1 proteins in kidneys of *Keap1*<sup>+/-</sup> and *Keap1*<sup>-/-</sup> mice at 10 days of age. Open and closed arrowheads indicate glycosylated and non-glycosylated forms of AQP2, respectively. The molecular weight standards are shown on the right. **(b)** Relative *Nqo1* and *Avp* gene expression levels in the hypothalamus of *Keap1*<sup>+/-</sup> and *Keap1*<sup>-/-</sup> mice at 10 days of age. Data are the means  $\pm$  SE (n=6).

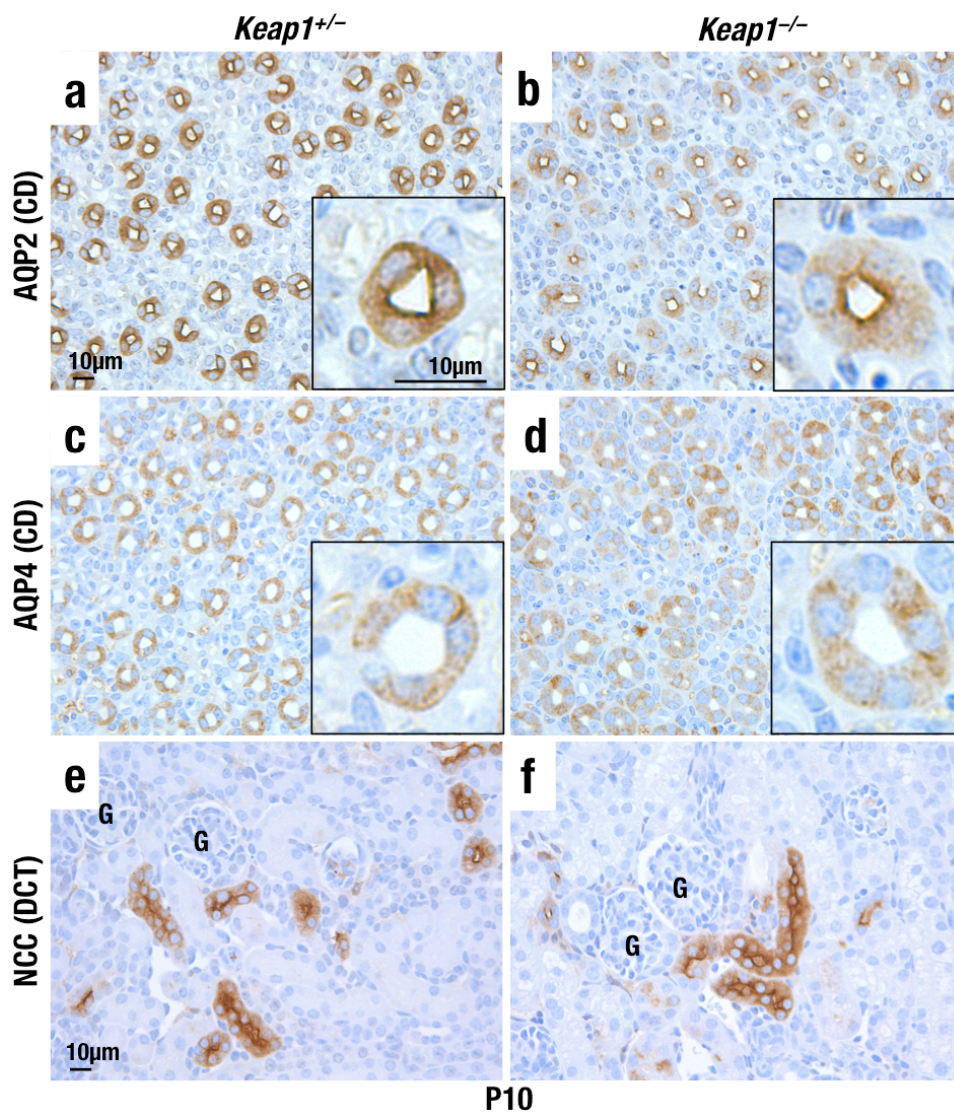

**Supplementary Figure 5.** Representative images of immunohistological staining for AQP2 (a,b), AQP4 (c,d) and NCC (e,f) of kidneys derived of *Keap1*<sup>+/-</sup> (a,c,e) and *Keap1*<sup>-/-</sup> (b,d,f) mice at 10 days of age (n=3). Scale bar, 10 μm. (a-d) Insets are higher magnification of collecting ducts. Scale bar, 10 μm. (e,f) Representative images of anti-NCC-stained renal cortex of *Keap1*<sup>+/-</sup> (e) and *Keap1*<sup>-/-</sup> (f) mice at 10 days of age. G, glomerulus. Scale bar, 10 μm. Note that accumulation of AQP2 in the apical region of the cells. CD, collecting ducts; DCT, distal convoluted tubules.

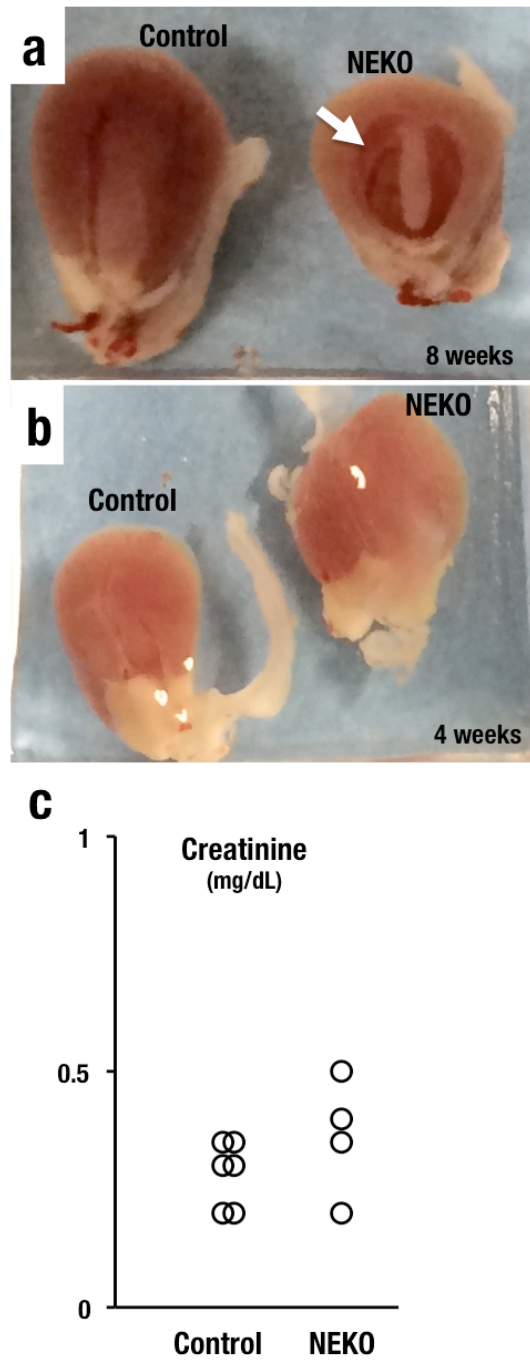

**Supplementary Figure 6.** (a,b) Coronal kidney sections of control and NEKO mice of 8 weeks (a) and 4 weeks (b) of age. (c) Plasma creatinine level of control and NEKO mice at 8-12 weeks of age.

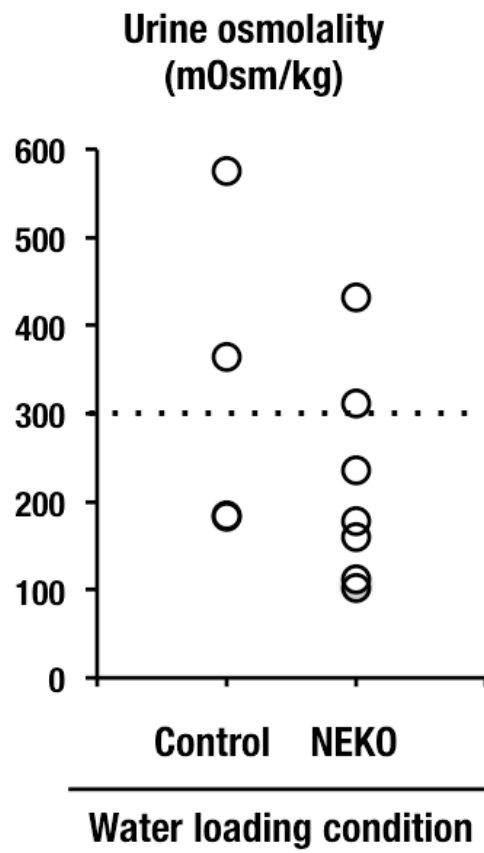

**Supplementary Figure 7.** Urine osmolality of control and NEKO mice at 8-12 weeks of age after challenging with water. Dotted line indicates the normal blood osmolality level.

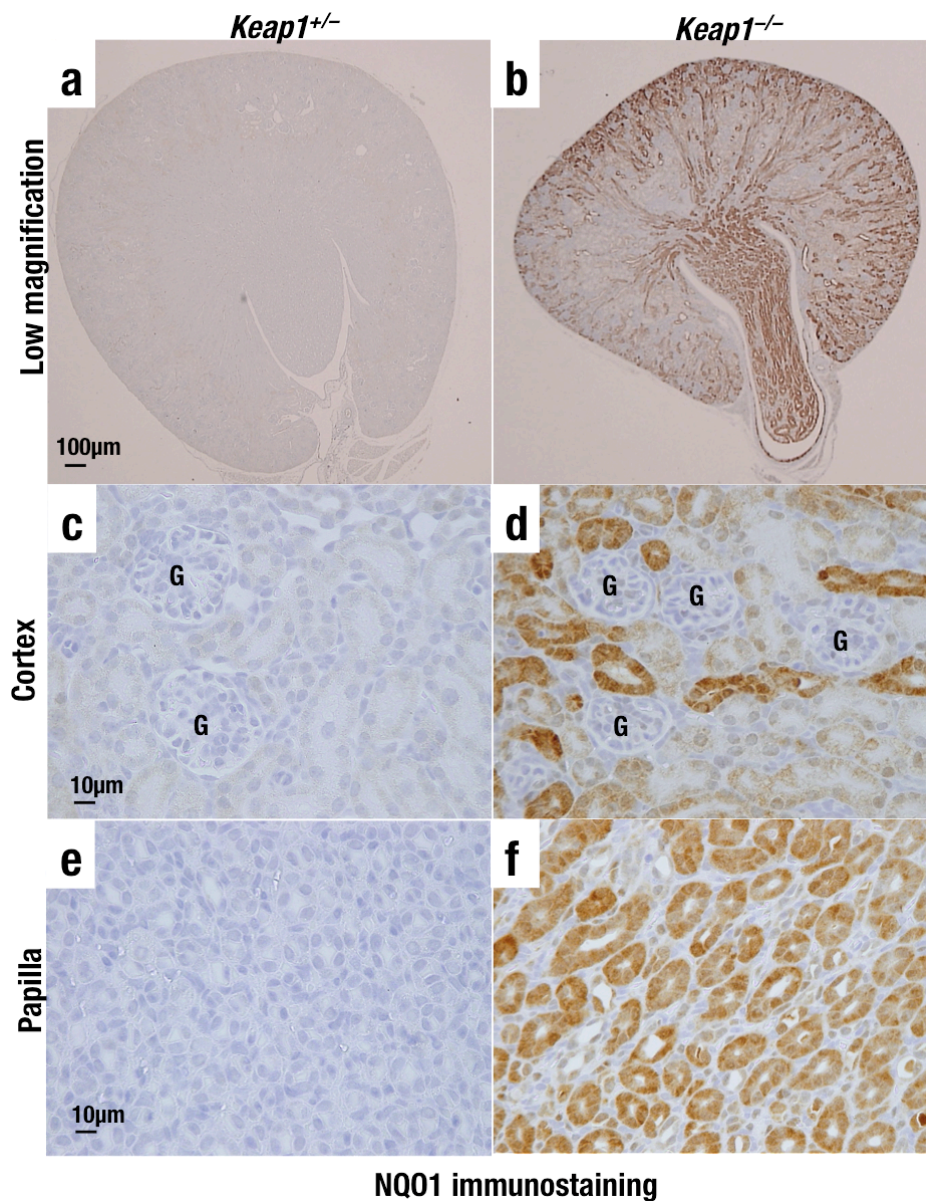

**Supplementary Figure 8.** NQO1 expression is highly induced in renal tubules and collecting ducts in *Keap1*-null mice. (a-d) Representative images of NQO1 immunostaining of kidneys from *Keap1*<sup>+/-</sup> (a,c,e) and *Keap1*<sup>-/-</sup> (b,d,f) mice at 10 days of age (n=3). (a,b) Lower magnification of coronal kidney sections. Scale bar, 100 μm. (c-f) Higher magnification of renal cortex (c,d) and papilla (e,f). G, glomerulus. Scale bar, 10 μm.



### DOX treatment from adult stage

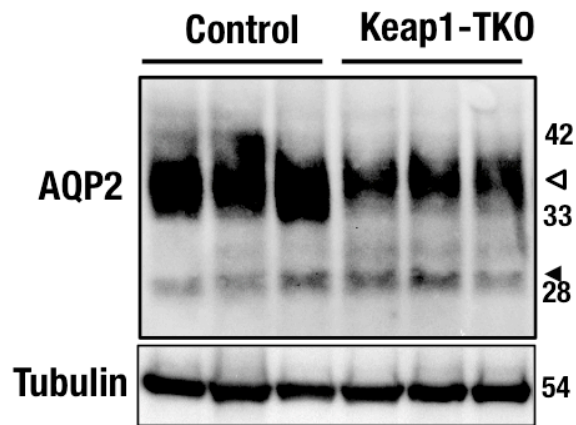

**Supplementary Figure 9.** Immunoblotting analysis of AQP2 protein in the kidney of control and Keap1-TKO mice treated with DOX during adult stage. Open and closed arrowheads indicate glycosylated and non-glycosylated forms of AQP2, respectively. The molecular weight standards are shown on the right.

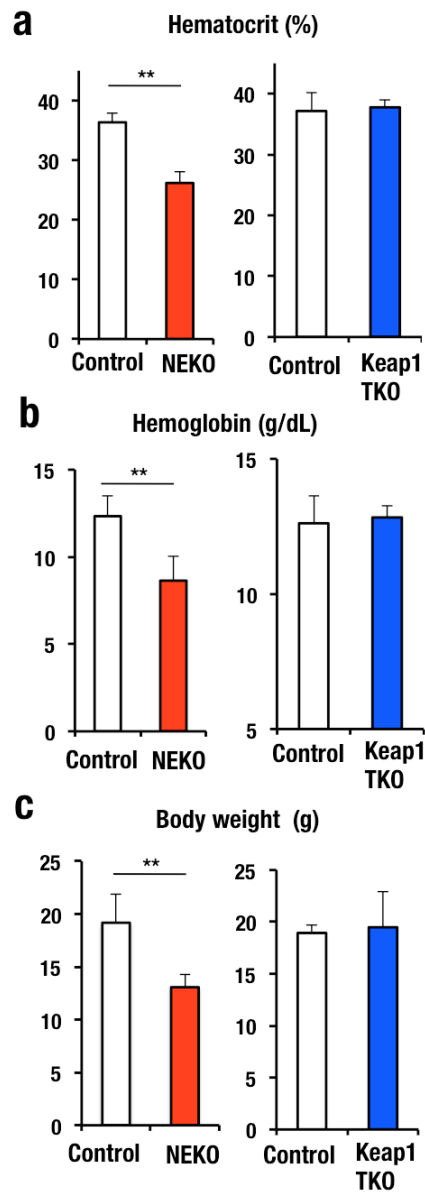

**Supplementary Figure 10.** (a,b) Hematocrit (a) and hemoglobin (b) of NEKO and Keap1-TKO mice at 8-12 weeks of age. Data are the means  $\pm$  SE (n=6) (\*\*,  $p < 0.01$ , unpaired *t*-test). Keap1-TKO mice were treated with DOX from an embryonic stage. (c) Body weight of female NEKO and Keap1-TKO mice at 8 weeks of age. Data are the means  $\pm$  SE (n=5) (\*\*,  $p < 0.01$ , unpaired *t*-test).

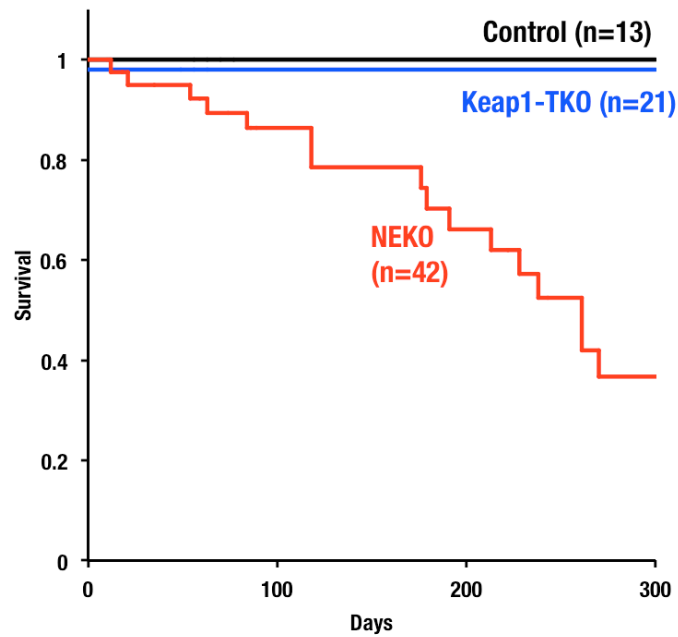

**Supplementary Figure 11.** Survival curve for control (n=13) and Keap1-TKO (n=21) mice treated with DOX from an embryonic stage. Survival curve of NEKO mice (n=42) in Figure 1 is also shown. Note that simple kidney tubule-specific knockout of Keap1 does not provoke lethality during this observation period.

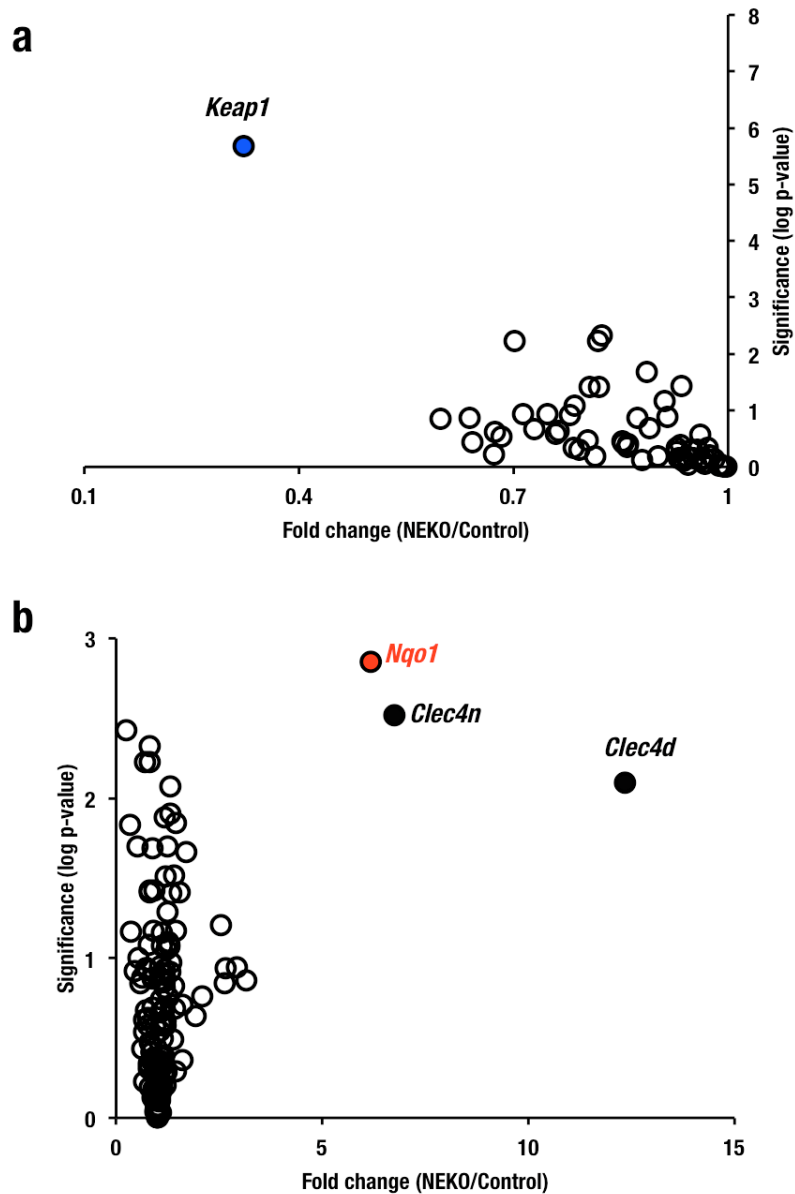

**Supplementary Figure 12.** Differentially-transcribed genes involving N-linked glycosylation and processing in the kidney of control and NEKO mice at 8 weeks of age. **(a)** Down-regulated genes in NEKO kidneys compared to controls. *Keap1* is shown as a positive control. **(b)** Up-regulated genes in NEKO kidneys compared to controls. *Nqo1* is shown as a positive control.

DBA-sorted cells (Collecting duct)

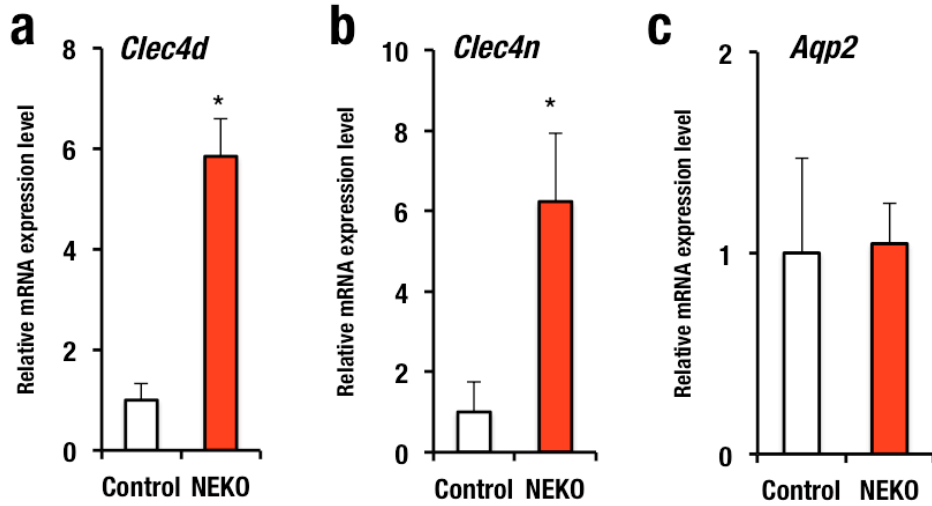

**Supplementary Figure 13.** Relative mRNA expression levels of *Clec4d*, *Clec4n* and *Aqp2* in DBA-sorted collecting ducts. Relative mRNA expression levels of *Clec4d* (a), *Clec4n* (b) and *Aqp2* (c) in control and NEKO mice at 8-12 weeks of age are normalized to *Hprt* gene expression in DBA-sorted collecting duct cells. Data are the means  $\pm$  SE (n=3). (\*, p<0.05 compared to control, unpaired *t*-test).

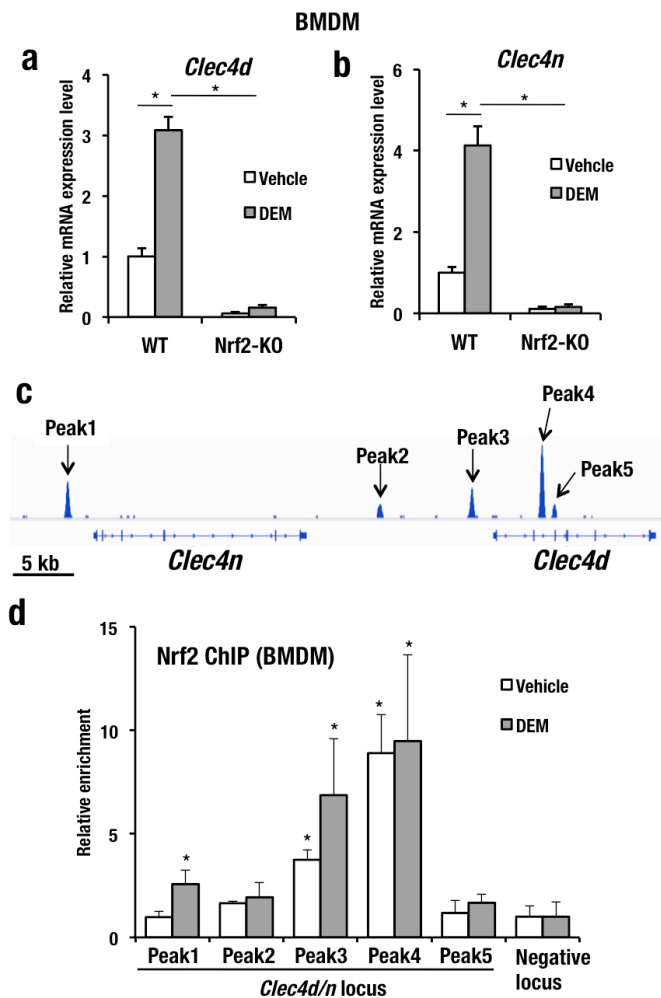

**Supplementary Figure 14.** Relative mRNA expression level of *Clec4d* (a) and *Clec4n* (b) normalized to *Gapdh* gene expression in bone marrow derived macrophages (BMDMs) from wild-type and *Nrf2*-null mice with or without 100- $\mu$ M DEM treatment for 6 hours. Data are the means  $\pm$  SE (n=3) (\*,  $p < 0.05$ , unpaired *t*-test). (c) Nrf2 binding to the proximity of the *Clec4d* and *Clec4n* genes in BMDMs from Nrf2 ChIP-seq analyses data<sup>24</sup>. (d) Nrf2 ChIP-qPCR analyses of BMDMs treated with or without 100- $\mu$ M DEM for 4 hours. Data are the means  $\pm$  SE (n=3) (\*,  $p < 0.05$  compared to negative locus, unpaired *t*-test).

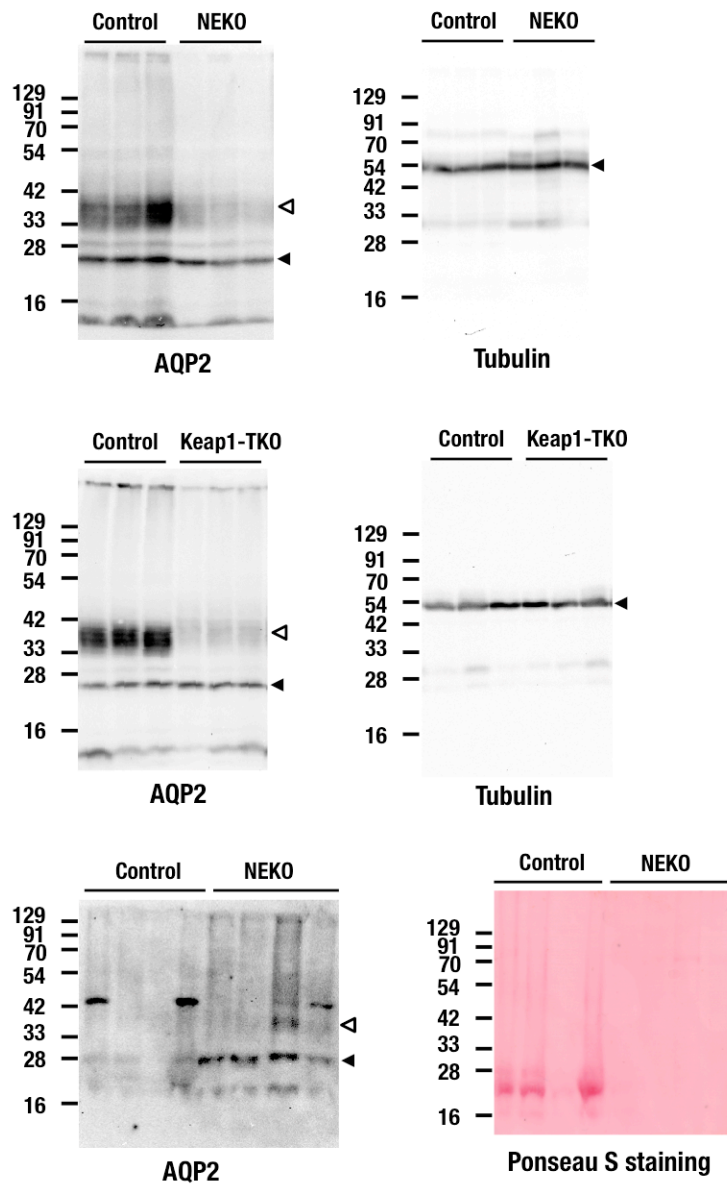

**Supplementary Figure 15.** Full blot and gel images for Figures 3d, 7e and 8a.

## Supplementary Table 1

List of primer and probe sequences used in this study.

| Assay                  | Gene                                  | Sequence                                                                                               |
|------------------------|---------------------------------------|--------------------------------------------------------------------------------------------------------|
| RT-PCR<br>(TaqMan)     | <i>Nqo1</i>                           | Sense AGCTGGAAGCTGCAGACCTG<br>Antisense CCTTTCAGAATGGCTGGCA<br>Probe ATTTCAGTTCCCATTGCAGTGGTTTGGG      |
|                        | <i>Hprt</i>                           | Sense CTGGTGAAAAGGACCTCTCG<br>Antisense TGAAGTACTCATTATAGTCAAGGG<br>Probe ATCCAACAAAGTCTGGCCTGTATCCAAC |
|                        | <i>Keap1</i>                          | Sense GATCGGCTGCACTGAACTG<br>Antisense GGAATCGCAGCGTACGTT<br>Probe CTGGCCACGTCATCAGCCG                 |
| RT-PCR<br>(SYBR-Green) | <i>Avp</i>                            | Sense GCTCTCCGCTTGTTTCCTGA<br>Antisense TGGGCAGTTCTGGAAGTAGCA                                          |
|                        | <i>Aqp2</i>                           | Sense CAGCTCGAAGGAAGGAGACA<br>Antisense GCATTGGCACCCCTGGTTCA                                           |
|                        | <i>Clec4d</i>                         | Sense GATGAGCAGTCATCTGGTGAC<br>Antisense TTCCAGAATACCGTGTGTG                                           |
|                        | <i>Clec4n</i>                         | Sense CTGCCCAAATCACTGGAAGT<br>Antisense ATCCGAAAGACCCAGGAAGT                                           |
| ChIP-qPCR              | <i>Clec4</i><br><i>Peak 1</i>         | Sense GGGGAATGTTTTCTCTTCCTG<br>Antisense AGGCATTACCAGCTGTTTCC                                          |
|                        | <i>Clec4</i><br><i>Peak 2</i>         | Sense ACCTTCCTCTTTGCTGGTGA<br>Antisense CTGCTCATGGCAAGATGGTA                                           |
|                        | <i>Clec4</i><br><i>Peak 3</i>         | Sense GGAGCCTGGGACCACTATTT<br>Antisense GCACATCATTGTGGAAGAGAC                                          |
|                        | <i>Clec4</i><br><i>Peak 4</i>         | Sense TCGGGAAAGGTGTTTTGTTG<br>Antisense GACTGGGTGTGACATGGT                                             |
|                        | <i>Clec4</i><br><i>Peak 5</i>         | Sense TTTCATTGAATTTATCTGGGATCA<br>Antisense AGTCCCCACACCTCTTTCT                                        |
|                        | <i>Clec4</i><br><i>Negative locus</i> | Sense TAGAGTGACATTGTGGCGCA<br>Antisense AGGAGCCAGAGACAGCCTAA                                           |
